# Supplementary material for: Characterization of Chromosomal Translocation Breakpoint Sequences in Solid Tumours: “An In Silico Analysis”
Source: PubMed Central journal article supplement — Open Med Inform J. 2015 Apr 30;9:1–8. doi: 10.2174/1874431101509010001 (PMC4421838; doi:10.2174/1874431101509010001), 2015-04-30
Supplement: TOMINFOJ-9-1_SD1.pdf [file TOMINFOJ-9-1_SD1.pdf]

## SUPPLEMENTARY MATERIAL

# Characterization of Chromosomal Translocation Breakpoint Sequences in Solid Tumours: “An *In Silico* Analysis”

Aditi Daga<sup>1</sup>, Afzal Ansari<sup>2</sup>, Rakesh Rawal<sup>3</sup> and Valentina Umrانيا<sup>1</sup>

<sup>1</sup>Department of Microbiology, MVM Science College, Saurashtra University, Rajkot, Gujarat, India

<sup>2</sup>BIT Virtual Institute of Bioinformatics (GCRI Node), GSBTM, Gandhinagar, Gujarat, India

<sup>3</sup>Department of Cancer Biology, The Gujarat Cancer & Research Institute, Ahmedabad, Gujarat, India

**Table S1. Nucleotide sequence of fusion partners retrieved from TICdb of major translocations.**

| Sr. No | Translocations | TICdb reference ID | Fusion sequences(FS)                                                                                                            | Length of FS in bps | Partner Chr. Having 100% identity | Partner Genes [5' / 3'] | BLAT result of FS | UCSC location of FS | UCSC location for 500US /DS From Breakpoint |
|--------|----------------|--------------------|---------------------------------------------------------------------------------------------------------------------------------|---------------------|-----------------------------------|-------------------------|-------------------|---------------------|---------------------------------------------|
| (1)    | t(2;2)         | 17625570           | atataatgtctaactcgggagactatgaaatattgtacTTGTACCGCCGGAAGCA<br>CCAGGAGCTGCAAGCCATGCAGATGGAGCTGC                                     | 87                  | Chr2                              | 5' EML4 (I)             | 1-39              | 42552656- 42552694  | 42552194-42553194                           |
|        |                |                    |                                                                                                                                 |                     | Chr2                              | 3' ALK (I)              | 40-87             | 29446347- 29446394  | 29445847-29446847                           |
| (2)    | t(10;10)       | 10931090           | cccgagtagctgtattacaggcacacggcaccacactggctgcttttgaTTATCTC<br>CTCAGCTGAGATGACCTTCCGGAGGCCCGCCAGGCCTT<br>CCCGGTCAGCTACTCCTCTCCGGTG | 125                 | Chr10                             | 5' CCDC6 (I)            | 1-55              | 61553383- 61553437  | 61552937-61553937                           |
|        |                |                    |                                                                                                                                 |                     | Chr10                             | 3' RET (I)              | 56-125            | 43610053- 43610122  | 43609553-43610553                           |
| (3)    | t(12;15)       | 9949179            | atactgatcagaacctgaagaagATGTGCAGCACATTAAGAGGAGA<br>GAC                                                                           | 51                  | Chr12                             | 5'ETV6(I)               | 1-25              | 12006471 12006495   | 12005995-12006995                           |
|        |                |                    |                                                                                                                                 |                     | Chr15                             | 3'NTRK3(I)              | 24-51             | 88483959 88483986   | 88483486-88484486                           |
| (4)    | t(5;6)         | 18083107           | aagcccactgacgctccaccgaaagATGATTTTTGGATAACCAGAAACA<br>AGTTTCATACTT                                                               | 60                  | Chr5                              | 5'CD74(I)               | 1-25              | 149784243 149784267 | 149783743-149784743                         |
|        |                |                    |                                                                                                                                 |                     | Chr6                              | 3'ROS1(I)               | 24-60             | 117645544 117645580 | 117645080-117646080                         |
| (5a)   | t(21;21)       | 16575875           | cgctggcctactctggaagttcagAACTCTCTGATGAATGCAGTGT                                                                                  | 47                  | Chr21                             | 5'TMPRSS2(I)            | 1-24              | 42861433 42861456   | 42860933-42861933                           |

| Sr. No | Translocations | TICdb reference ID | Fusion sequences(FS)                                                                  | Length of FS in bps | Partner Chr. Having 100% identity | Partner Genes [5' / 3'] | BLAT result of FS | UCSC location of FS | UCSC location for 500US /DS From Breakpoint |
|--------|----------------|--------------------|---------------------------------------------------------------------------------------|---------------------|-----------------------------------|-------------------------|-------------------|---------------------|---------------------------------------------|
|        |                |                    |                                                                                       |                     | Chr21                             | 3'ERG(I)                | 24-47             | 39795460 39795483   | 39794983-39795983                           |
| (5b)   | t(21;21)       | 16575875           | gcaagatggcttgaactcagAAGCCTTATCAGTTGTGAGTG                                             | 42                  | Chr21                             | 5'TMPRSS2(I)            | 1-21              | 42870045 42870065   | 42869545-42870545                           |
|        |                |                    |                                                                                       |                     | Chr21                             | 3'ERG(I)                | 21-42             | 39817523 39817544   | 39817044-39818044                           |
| (6)    | t(15;7)        | 17671502           | caactaacactgcggcttctcagTGCCTATGATCAGAAGCCACAAGT<br>G                                  | 49                  | Chr15                             | 5'HMG2P46 (I)           | 1-24              | 45806138 45806161   | 45805661-45806661                           |
|        |                |                    |                                                                                       |                     | Chr7                              | 3'ETV1(I)               | 23-49             | 13975497 13975523   | 13975023-13976023                           |
| (7)    | t(1;X)         | 9393982            | gtggttccatgatgggaagtacatgCTGCCTGTGTCAGGGAATCTGCTT                                     | 50                  | Chr1                              | 5'SFPQ(I)               | 1-26              | 35652602 35652627   | 35652102-35653102                           |
|        |                |                    |                                                                                       |                     | ChrX                              | 3'TFE3(I)               | 26-50             | 48891743 48891767   | 48891267-48892267                           |
| (8)    | t(5;8)         | 9525740            | tctgcgactcattcatcgccctcagATTGGCCAAAATGGGAAGGATTG<br>GA                                | 51                  | Chr5                              | 5'LIFR(I)               | 1-26              | 38595363 38595388   | 38594863-38595863                           |
|        |                |                    |                                                                                       |                     | Chr8                              | 3'PLAG1(I)              | 25-51             | 57083724 57083750   | 57083250-57084250                           |
| (9)    | t(12;3)        | 8988031            | tttcacaggaatgacagcatctatgaggagCCACAACAAGTTGTTTCAGAAG<br>AAGCTGCT                      | 60                  | Chr12                             | 3'HMGA2(I)              | 29-60             | 66345161 66345192   | 66344661-66345661                           |
|        |                |                    |                                                                                       |                     | Chr3                              | 5'FHIT(I)               | 1-30              | 59908072 59908101   | 59907572-59908572                           |
| (10a)  | t(12;9)        | 9484777            | agttgttcagaagaagcctgctcagTCCTGGTACCTGGGCTAGCTTGGT<br>TCCTTTCCAAG                      | 60                  | Chr12                             | 5'HMGA2(I)              | 1-25              | 66345171 66345195   | 66344695-66345695                           |
|        |                |                    |                                                                                       |                     | Chr9                              | 3'NFIB(I)               | 23-60             | 14088291 14088328   | 14087828-14088828                           |
| (10b)  | t(12;9)        | 9484777            | CcaagaggcagacctaggaatggTCCTGGTACCTGGGCTAGCTTGGT<br>TCCTTTCCAAGTG                      | 61                  | Chr12                             | 5'HMGA2(I)              | 1-24              | 66232326 66232349   | 66231849-66232849                           |
|        |                |                    |                                                                                       |                     | Chr9                              | 3'NFIB(I)               | 24-61             | 14088289 14088326   | 14087826-14088826                           |
| (11)   | t(9;15)        | 17934517           | tatgtcaagtctgtttacagaaaaagcaaggaaccgttctCATCTGCATTGCCG<br>GGACCGGATATGAGCATGAAACCTAGT | 84                  | Chr9                              | 5'BRD3(I)               | 1-43              | 136901154 136901196 | 136900654-136901654                         |
|        |                |                    |                                                                                       |                     | Chr15                             | 3'NUTM1(I)              | 43-84             | 34640170 34640210   | 34639670-34640670                           |
| (12)   | t(22;21)       | S82335             | ctattcctctacacagccgactagttatgatcatCAGATTCTTGGACCAACAA<br>GTAGCCGCCTTGCAAATCCAG        | 74                  | Chr22                             | 5'EWSR1(I)              | 1-33              | 29682912 29682944   | 29682444-29683444                           |

| Sr. No | Translocations | TICdb reference ID | Fusion sequences(FS)                                             | Length of FS in bps | Partner Chr. Having 100% identity | Partner Genes [5' / 3'] | BLAT result of FS | UCSC location of FS | UCSC location for 500US /DS From Breakpoint |
|--------|----------------|--------------------|------------------------------------------------------------------|---------------------|-----------------------------------|-------------------------|-------------------|---------------------|---------------------------------------------|
|        |                |                    |                                                                  |                     | Chr21                             | 3'ERG(I)                | 33-74             | 39762917 39762958   | 39762458-39763458                           |
| (13a)  | t(22;11)       | 18602673           | agcagcagctacgggcagcagaACCCTTCTTATGACTCAGTC                       | 42                  | Chr22                             | 5'EWSR1(I)              | 1-22              | 29683102 29683123   | 29682623-29683623                           |
|        |                |                    |                                                                  |                     | Chr11                             | 3'FLI1(I)               | 23-42             | 128675261 128675280 | 128674761-128675761                         |
| (13b)  | t(22;11)       | S62665             | AGCCAACAGAGCAGCAGCTACGGGCAGCAGAGTCCTCCC<br>CTTGGAGGGGCACAAACGATC | 66                  | Chr22                             | 5'EWSR1(I)              | 1-33              | 29683093 29683125   | 29682625-29683625                           |
|        |                |                    |                                                                  |                     | Chr11                             | 3'FLI1(I)               | 32-60             | 128677075 128677103 | 128676575-128677575                         |

**Note:** Sequence in lower case represents 5' partner gene and upper case represents 3' partner gene. US: upstream, DS: downstream.

**Table S2. Analysis and characterization of various parameters for 1000bps (500 bp Upstream & 500 bp Downstream) sequence around breakpoint.**

| Sr no. | Translocations | Chr. partners | Location of RSS                                       | Location of Repeats                                                       | Partner Gene [5' / 3' ends] & Intronic(I)/ Exonic (E) Break | # of SIDD sites [Threshold cut off of G(x) <4] |
|--------|----------------|---------------|-------------------------------------------------------|---------------------------------------------------------------------------|-------------------------------------------------------------|------------------------------------------------|
| (1)    | t(2;2)         | Chr2          | U(435 – 462, 225 – 263, 250 – 288)                    | D (518-585) <sup>e</sup>                                                  | 5' EML4 (I)                                                 | 1                                              |
|        |                | Chr2          | D(534 - 561,795 – 833)                                | D(802-1215) <sup>e</sup>                                                  | 3' ALK (I)                                                  | 5                                              |
| (2)    | t(10;10)       | Chr10         | U (75 - 113)                                          | W(323-610) <sup>e</sup> /D(694-714) <sup>T</sup>                          | 5' CCDC6 (I)                                                | 7                                              |
|        |                | Chr10         | U(127 – 165)<br>D(851 – 889)                          | U(112-282) <sup>y</sup>                                                   | 3' RET (I)                                                  | 1                                              |
| (3)    | t(12;15)       | Chr12         | U(244 - 282 ,288 - 326 ),<br>D(839 - 866 ,959 - 986 ) | U(1-128) <sup>e</sup> ,D(592-639) <sup>y</sup> , D(815-1000) <sup>D</sup> | 5'ETV6(I)                                                   | 3                                              |
|        |                | Chr15         | D(551 - 578 )                                         | D(702-790 , 983-1000) <sup>e</sup> , D(841-968) <sup>D</sup>              | 3'NTRK3(I)                                                  | 2                                              |
| (4)    | t(5;6)         | Chr5          | U(28 - 55 , 291 - 329 )                               | U(2-37) <sup>e</sup>                                                      | 5'CD74(I)                                                   | 1                                              |
|        |                | Chr6          | D(686 - 724 , 709 - 747)                              | D(639-718 , 952-1000) <sup>D</sup>                                        | 3'ROS1(I)                                                   | 11                                             |
| (5a)   | t(21;21)       | Chr21         | U(105 - 132,105 - 143,<br>267 - 305), D(676 - 703 )   | D(873-1000) <sup>e</sup>                                                  | 5'TMPRSS2(I)                                                | 3                                              |

| Sr no. | Translocations | Chr. partners | Location of RSS                                   | Location of Repeats                                                                                    | Partner Gene [5' / 3' ends] & Intronic(I)/ Exonic (E) Break | # of SIDD sites [Threshold cut off of G(x) <4] |
|--------|----------------|---------------|---------------------------------------------------|--------------------------------------------------------------------------------------------------------|-------------------------------------------------------------|------------------------------------------------|
|        |                | Chr21         | U(26 - 53, 32 - 59 ) ,<br>D(573 - 611,822 - 860 ) | U(22-60) <sup>S</sup> , U(118-146) <sup>E</sup> , D(643-918) <sup>E</sup> ,<br>D(922-945) <sup>S</sup> | 3'ERG(I)                                                    | 4                                              |
| (5b)   | t(21;21)       | Chr21         | D(956 - 994)                                      | —                                                                                                      | 5'TMPRSS2(I)                                                | 2                                              |
|        |                | Chr21         | U(134 - 172 ) , D(936 - 974)                      | U(8-191) <sup>E</sup>                                                                                  | 3'ERG(I)                                                    | 4                                              |
| (6)    | t(15;7)        | Chr15         | U(271 - 309)                                      | U(12-502) <sup>V</sup> , D(511-598,924-1000) <sup>V</sup> , D(600-923) <sup>E</sup>                    | 5'HMGN2P46(I)                                               | 3                                              |
|        |                | Chr7          | U(413 - 451 )                                     | D(994-1000) <sup>E</sup>                                                                               | 3'ETV1(I)                                                   | 8                                              |
| (7)    | t(1;X)         | Chr1          | D(951 - 989 )                                     | U(409-435) <sup>S</sup> ,<br>D(948-1000) <sup>E</sup>                                                  | 5'SFPQ(I)                                                   | 7                                              |
|        |                | ChrX          | —                                                 | —                                                                                                      | 3'TFE3(I)                                                   | 1                                              |
| (8)    | t(5;8)         | Chr5          | U(132 - 170)                                      | U(64-208) <sup>D</sup> ,<br>D(785-877, 972-1000) <sup>E</sup>                                          | 5'LIFR(I)                                                   | 4                                              |
|        |                | Chr8          | U(466 - 493 ) , D(837 - 864 )                     | D(832-857) <sup>E</sup>                                                                                | 3'PLAG1(I)                                                  | 10                                             |
| (9)    | t(12;3)        | Chr12         | U(50 - 77)                                        | U(52-357) <sup>E</sup> ,<br>D(763-791) <sup>E</sup>                                                    | 3'HMGA2(I)                                                  | 9                                              |
|        |                | Chr3          | —                                                 | —                                                                                                      | 5'FHIT(I)                                                   | 6                                              |
| (10a)  | t(12;9)        | Chr12         | U(16 - 43)                                        | U(20-325) <sup>E</sup> , D(733-761) <sup>E</sup>                                                       | 5'HMGA2(I)                                                  | 10                                             |
|        |                | Chr9          | —                                                 | U(348-375) <sup>E</sup>                                                                                | 3'NFIB(I)                                                   | 10                                             |
| (10b)  | t(12;9)        | Chr12         | U(108 - 146 )                                     | D(904-947) <sup>S</sup>                                                                                | 5'HMGA2(I)                                                  | 8                                              |
|        |                | Chr9          | —                                                 | U(348-375) <sup>E</sup>                                                                                | 3'NFIB(I)                                                   | 12                                             |
| (11)   | t(9;15)        | Chr9          | U(364 - 402 )                                     | —                                                                                                      | 5'BRD3(I)                                                   | 1                                              |
|        |                | Chr15         | U(49 - 87 ) ,<br>D(624 - 662 ,844 - 882 )         | U(1-112 , 128-407) <sup>E</sup>                                                                        | 3'NUTM1(I)                                                  | 3                                              |
| (12b)  | t(22;21)       | Chr22         | U(222 - 249,305 - 332,<br>356 - 383)              | U(1-264) <sup>E</sup> ,<br>D(754-1000) <sup>E</sup>                                                    | 5'EWSR1(I)                                                  | 6                                              |
|        |                | Chr21         | U(5 - 43 , 313 - 340 ) ,<br>D(874 - 912 )         | U(1-255) <sup>E</sup>                                                                                  | 3'ERG(I)                                                    | 6                                              |
| (13a)  | t(22;11)       | Chr22         | U(43 - 70,126 - 153 ,                             | U(1-77) <sup>E</sup> ,                                                                                 | 5'EWSR1(I)                                                  | 4                                              |

| Sr no. | Translocations | Chr. partners | Location of RSS                                | Location of Repeats                                 | Partner Gene [5' / 3' ends] & Intronic(I)/ Exonic (E) Break | # of SIDD sites [Threshold cut off of G(x) <4] |
|--------|----------------|---------------|------------------------------------------------|-----------------------------------------------------|-------------------------------------------------------------|------------------------------------------------|
|        |                |               | 177 - 204), D(883 - 910 )                      | D(565-1000) <sup>€</sup>                            |                                                             |                                                |
|        |                | Chr11         | —                                              | U(68-287) <sup>€</sup>                              | 3'FLI1(I)                                                   | 8                                              |
| (13b)  | t(22;11)       | Chr22         | U(41 - 68 , 124 - 151,175 - 202) ,D(881 - 908) | U(1-73) <sup>€</sup> ,<br>D(562-1000) <sup>€</sup>  | 5'EWSR1(I)                                                  | 4                                              |
|        |                | Chr11         | —                                              | U(75-378) <sup>¥</sup> ,<br>D(733-929) <sup>€</sup> | 3'FLI1(I)                                                   | 7                                              |

Note: W: within, U: upstream, D: downstream of the breakpoint. €=Sine, ¥ = Line, £= Low complexity repeat, T=Tandem repeats, D = DNA Repeat, S= simple repeat

Table S3. Analysis of physico-chemical parameters/AT% within destabilized region (SIDD) & 1000 bps sequence around breakpoint.

| Serial No. | Translocation | Chromosome Partner | Partner Gene [5' / 3' ends] | Base pair Location | Flexibility (kJ / mol A <sup>3</sup> ) | Melting Temperature (°C) | Stacking Energy (kcal/mol) | AT (%) |
|------------|---------------|--------------------|-----------------------------|--------------------|----------------------------------------|--------------------------|----------------------------|--------|
|            |               |                    |                             |                    | Expected Values                        |                          |                            |        |
|            |               |                    |                             |                    | 7.931                                  | 73.622                   | -8.080                     |        |
| (1)        | t(2;2)        | Chr2               | EML4                        | 1..1001            | 8.602                                  | 66.943                   | -7.297                     | 64.1   |
|            |               |                    |                             | 495..600           | 9.001                                  | 55.519                   | -6.136                     | 69.5   |
|            |               | Chr2               | ALK                         | 1..1001            | 7.766                                  | 73.333                   | -7.958                     | 48.5   |
|            |               |                    |                             | 663..803           | 9.458                                  | 62.461                   | -6.760                     | 57.9   |
| (2)        | t(10;10)      | Chr10              | CCDC6                       | 1..1001            | 8.544                                  | 69.180                   | -7.502                     | 59.3   |
|            |               |                    |                             | 654..813           | 9.433                                  | 62.831                   | -6.794                     | 65.3   |
|            |               | Chr10              | RET                         | 1..1001            | 7.042                                  | 77.745                   | -8.459                     | 38.7   |
|            |               |                    |                             | 418..454           | 8.459                                  | 74.581                   | -8.344                     | 74.1   |
| (3)        | t(12;15)      | Chr12              | 5'ETV6                      | 1..1001            | 8.189                                  | 71.104                   | -7.756                     | 55.8   |
|            |               |                    |                             | 488..623           | 9.121                                  | 67.538                   | -7.341                     | 65.7   |
|            |               | Chr15              | 3'NTRK3                     | 1..1001            | 7.925                                  | 72.920                   | -7.916                     | 53.7   |
|            |               |                    |                             | 425..599           | 7.924                                  | 74.195                   | -8.133                     | 62.5   |
| (4)        | t(5;6)        | Chr5               | 5'CD74                      | 1..1001            | 7.542                                  | 75.690                   | -8.179                     | 45.8   |
|            |               |                    |                             | 523..622           | 7.888                                  | 72.598                   | -7.945                     | 53.9   |
|            |               | Chr6               | 3'ROS1                      | 1..1001            | 9.023                                  | 65.170                   | -7.046                     | 71.4   |
|            |               |                    |                             | 443..549           | 9.920                                  | 60.957                   | -6.593                     | 82.5   |

| Serial No. | Translocation | Chromosome Partner | Partner Gene [5' / 3' ends] | Base pair Location | Flexibility (kJ/mol A <sup>2</sup> ) | Melting Temperature (°C) | Stacking Energy (kcal/mol) | AT (%) |
|------------|---------------|--------------------|-----------------------------|--------------------|--------------------------------------|--------------------------|----------------------------|--------|
|            |               |                    |                             |                    | Expected Values                      |                          |                            |        |
|            |               |                    |                             |                    | 7.931                                | 73.622                   | -8.080                     |        |
| (5a)       | t(21;21)      | Chr21              | 5'TMPRSS2                   | 1..1001            | 7.813                                | 72.936                   | -7.929                     | 35.2   |
|            |               |                    |                             | 539..670           | 8.391                                | 70.153                   | -7.687                     | 48.4   |
|            |               | Chr21              | 3'ERG                       | 1..1001            | 7.834                                | 73.090                   | -7.981                     | 54.3   |
|            |               |                    |                             | 486..620           | 8.584                                | 70.674                   | -7.745                     | 65.3   |
| (5b)       | t(21;21)      | Chr21              | 5'TMPRSS2                   | 1..1001            | 7.829                                | 73.131                   | -7.928                     | 53.1   |
|            |               |                    |                             | 440..672           | 9.037                                | 66.783                   | -7.250                     | 67.8   |
|            |               | Chr21              | 3'ERG                       | 1..1001            | 8.327                                | 71.554                   | -7.786                     | 56.3   |
|            |               |                    |                             | 490..710           | 9.129                                | 67.834                   | -7.352                     | 65.2   |
| (6)        | t(15;7)       | Chr15              | 5'HMGN2P46                  | 1..1001            | 8.345                                | 70.454                   | -7.640                     | 60.5   |
|            |               |                    |                             | 451..597           | 8.505                                | 69.878                   | -7.615                     | 63.6   |
|            |               | Chr7               | 3'ETV1                      | 1..1001            | 9.026                                | 66.615                   | -7.199                     | 65.8   |
|            |               |                    |                             | 459..598           | 9.274                                | 67.475                   | -7.248                     | 76.3   |
| (7)        | t(1;X)        | Chr1               | 5'SFPQ                      | 1..1001            | 8.653                                | 68.140                   | -7.388                     | 63.6   |
|            |               |                    |                             | 324..471           | 9.373                                | 65.499                   | -7.033                     | 69.3   |
|            |               | ChrX               | 3'TFE3                      | 1..1001            | 7.863                                | 73.596                   | -7.958                     | 49.2   |
|            |               |                    |                             | 519..596           | 8.008                                | 73.803                   | -7.934                     | 61.6   |
| (8)        | t(5;8)        | Chr5               | 5'LIFR                      | 1..1001            | 8.208                                | 71.100                   | -7.734                     | 55.6   |
|            |               |                    |                             | 338..486           | 8.543                                | 71.271                   | -7.652                     | 66.1   |
|            |               | Chr8               | 3'PLAG1                     | 1..1001            | 8.886                                | 66.034                   | -7.165                     | 66.2   |
|            |               |                    |                             | 413..580           | 9.117                                | 67.847                   | -7.343                     | 73.4   |
| (9)        | t(12;3)       | Chr12              | 3'HMGA2                     | 1..1001            | 8.805                                | 67.061                   | -7.265                     | 64.1   |
|            |               |                    |                             | 385..579           | 9.667                                | 63.274                   | -6.804                     | 74.3   |
|            |               | Chr3               | 5'FHIT                      | 1..1001            | 8.518                                | 68.835                   | -7.523                     | 60.2   |
|            |               |                    |                             | 472..626           | 8.655                                | 69.445                   | -7.599                     | 71.4   |
| (10a)      | t(12;9)       | Chr12              | 5'HMGA2                     | 1..1001            | 8.776                                | 67.293                   | -7.293                     | 64.4   |
|            |               |                    |                             | 408..606           | 9.722                                | 63.428                   | -6.807                     | 73.7   |
|            |               | Chr9               | 3'NFIB                      | 1..1001            | 9.166                                | 65.848                   | -7.123                     | 67.3   |
|            |               |                    |                             | 300..546           | 9.319                                | 68.225                   | -7.302                     | 74.7   |

| Serial No. | Translocation | Chromosome Partner | Partner Gene [5' / 3' ends] | Base pair Location | Flexibility (kJ/mol A <sup>2</sup> ) | Melting Temperature (°C) | Stacking Energy (kcal/mol) | AT (%) |
|------------|---------------|--------------------|-----------------------------|--------------------|--------------------------------------|--------------------------|----------------------------|--------|
|            |               |                    |                             |                    | Expected Values                      |                          |                            |        |
|            |               |                    |                             |                    | 7.931                                | 73.622                   | -8.080                     |        |
| (10b)      | t(12;9)       | Chr12              | 5'HMGA2                     | 1..1001            | 9.379                                | 65.759                   | -7.116                     | 68.3   |
|            |               |                    |                             | 414..548           | 9.606                                | 66.236                   | -7.106                     | 79.1   |
|            |               | Chr9               | 3'NFIB                      | 1..1001            | 9.153                                | 65.944                   | -7.135                     | 67.1   |
|            |               |                    |                             | 490..716           | 9.264                                | 64.234                   | -6.959                     | 70.3   |
| (11)       | t(9;15)       | Chr9               | 5'BRD3                      | 1..1001            | 7.420                                | 76.818                   | -8.321                     | 43.2   |
|            |               |                    |                             | 493..600           | 8.882                                | 69.527                   | -7.585                     | 61.4   |
|            |               | Chr15              | 3'NUTM1                     | 1..1001            | 7.908                                | 73.850                   | -7.999                     | 49.5   |
|            |               |                    |                             | 385..578           | 9.219                                | 68.324                   | -7.348                     | 63.4   |
| (12)       | t(22;21)      | Chr22              | 5'EWSR1                     | 1..1001            | 8.200                                | 71.633                   | -7.787                     | 55.1   |
|            |               |                    |                             | 389..514           | 9.382                                | 67.398                   | -7.336                     | 65.3   |
|            |               | Chr21              | 3'ERG                       | 1..1001            | 8.331                                | 70.033                   | -7.629                     | 57.4   |
|            |               |                    |                             | 419..541           | 8.950                                | 68.334                   | -7.434                     | 64.6   |
| (13a)      | t(22;11)      | Chr22              | 5'EWSR1                     | 1..1001            | 8.245                                | 71.199                   | -7.736                     | 55.2   |
|            |               |                    |                             | 489..611           | 9.265                                | 67.670                   | -7.308                     | 66.7   |
|            |               | Chr11              | 3'FLI1                      | 1..1001            | 8.765                                | 68.196                   | -7.410                     | 61.3   |
|            |               |                    |                             | 472..601           | 8.863                                | 67.694                   | -7.311                     | 63.8   |
| (13b)      | t(22;11)      | Chr22              | 5'EWSR1                     | 1..1001            | 8.261                                | 71.150                   | -7.729                     | 55.1   |
|            |               |                    |                             | 486..611           | 9.173                                | 67.639                   | -7.305                     | 64.5   |
|            |               | Chr11              | 3'FLI1                      | 1..1001            | 8.560                                | 69.460                   | -7.545                     | 58.3   |
|            |               |                    |                             | 659..817           | 9.312                                | 65.801                   | -7.163                     | 68.2   |

Table S4. Analysis &amp; characterization of various parameters of housekeeping gene GAPDH taken as control.

| Sr No. | Genomic location of GAPDH Gene(12p13.31) (feb 2009/hg19) | Length of exonic sequences (Bps) | Genomic location of RSS (feb 2009/hg19) | Genomic Location of Repeats (feb 2009/hg19) | # of SIDD sites [Threshold cut off of G(x) <4] | Flexibility (kJ/mol A <sup>2</sup> ) | Melting Temperature (°C)   | Stacking Energy (kcl/mol) | AT (%)                    |
|--------|----------------------------------------------------------|----------------------------------|-----------------------------------------|---------------------------------------------|------------------------------------------------|--------------------------------------|----------------------------|---------------------------|---------------------------|
|        |                                                          |                                  |                                         |                                             |                                                | Cutoff Values (ROC)                  |                            |                           |                           |
|        |                                                          |                                  |                                         |                                             |                                                | 7.9<br>Sp=100<br>Sn=96.7             | 73.6<br>Sp =100<br>Sn =100 | -8.1<br>Sp=100<br>Sn=100  | 47.5<br>Sp=100<br>Sn=96.7 |
| (1)    | 6643977 – 6644026 (E)                                    | 51                               | 0                                       | 0                                           | 0                                              | 7.4                                  | 77.3                       | -8.5                      | 40.0                      |
| (2)    | 6646087 – 6646176 (E)                                    | 90                               | 0                                       | 0                                           | 0                                              | 7.3                                  | 77.2                       | -8.5                      | 40.1                      |
| (3)    | 6646268 – 6646382 (E)                                    | 115                              | 0                                       | 0                                           | 0                                              | 7.5                                  | 73.6                       | -8.0                      | 47.3                      |
| (4)    | 6646476 – 6646556 (E)                                    | 81                               | 0                                       | 0                                           | 0                                              | 7.3                                  | 74.2                       | -8.1                      | 47.5                      |
| (5)    | 6646749 – 6647162 (E)                                    | 413                              | 0                                       | 0                                           | 0                                              | 7.2                                  | 77.2                       | -8.4                      | 40.7                      |
| (6)    | 6643927 – 6644026 (I/E)                                  | 100                              | 0                                       | 0                                           | 0                                              | 7.1                                  | 80.4                       | -8.85                     | 34.3                      |
| (7)    | 6646037 – 6646136 (I/E)                                  | 100                              | 0                                       | 0                                           | 0                                              | 7.5                                  | 75.4                       | -8.15                     | 41.9                      |
| (8)    | 6646218 – 6646317 (I/E)                                  | 100                              | 0                                       | 0                                           | 0                                              | 7.3                                  | 75.9                       | -8.25                     | 42.4                      |
| (9)    | 6646426 – 6646525 (I/E)                                  | 100                              | 0                                       | 0                                           | 0                                              | 7.1                                  | 77.5                       | -8.4                      | 39.8                      |
| (10)   | 6646701 – 6646800 (I/E)                                  | 100                              | 0                                       | 0                                           | 0                                              | 7.3                                  | 76.7                       | -8.3                      | 41.1                      |

**Note:** E: Core Exonic sequence; I/E: Intron exon flanking sequence; Sp: Specificity; Sn: Sensitivity.



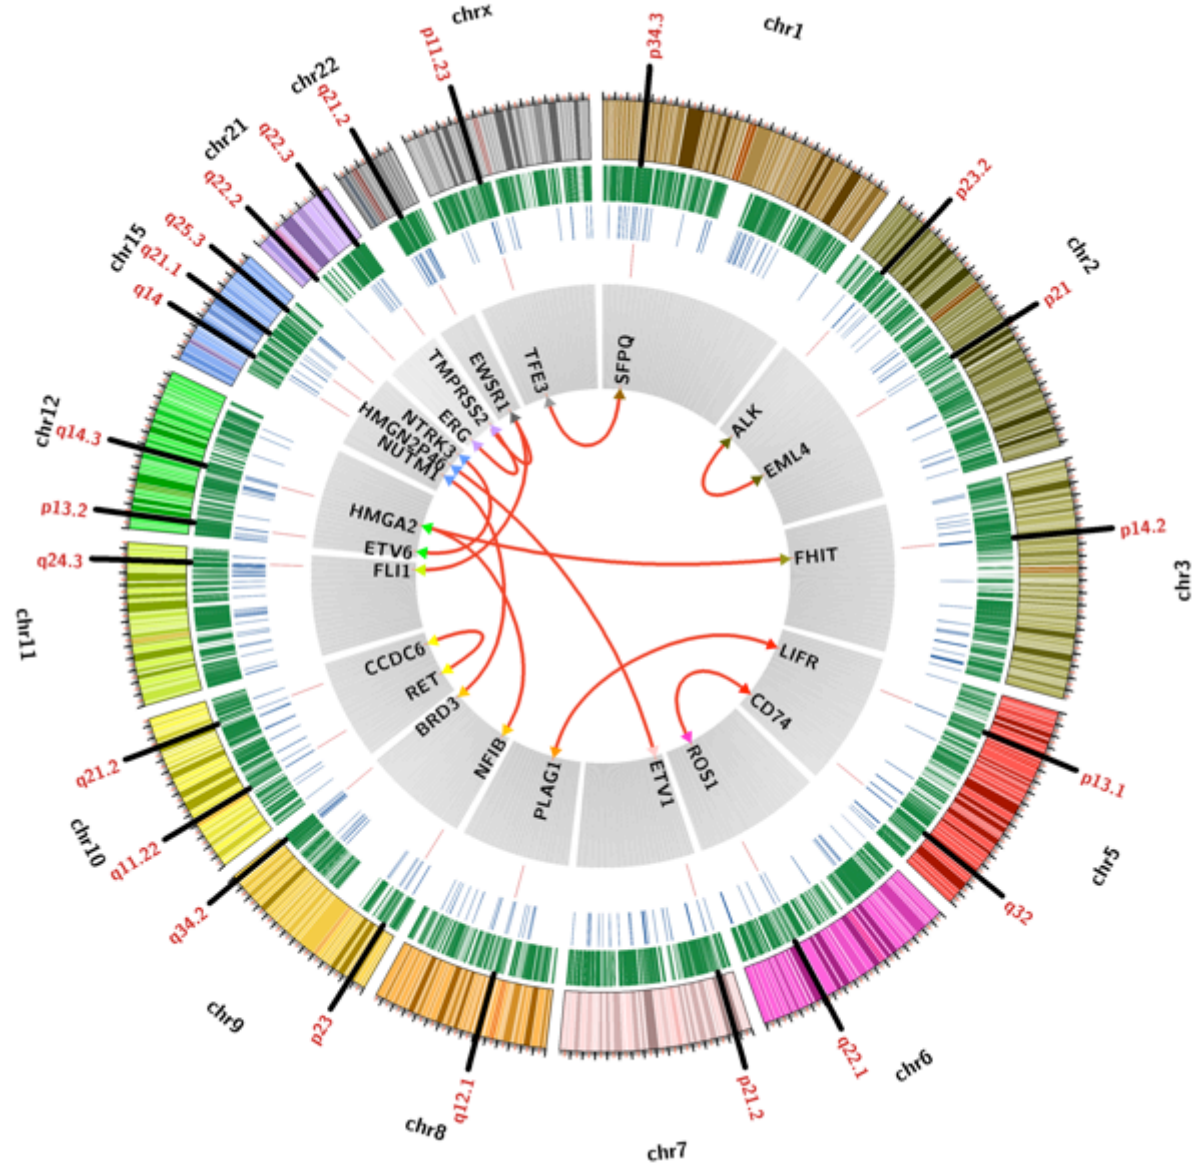

**Fig. (S1). Circos plot of chromosomal translocations (Oncogenic Fusion genes) in solid tumors.** Outer most track indicates the total length of the chromosomal coordinates in the clockwise direction (scale 1 = 1000000bps). The second track is denoting the complete set of genes of respective chromosomes. The next (blue bands) shows the total numbers of cancerous genes present within each of these chromosomes and the innermost track (red bands) depicts oncogenic fusion genes involved in the rearrangements which are shown by connecting lines and their cytobands (red) are shown on the outermost circle.

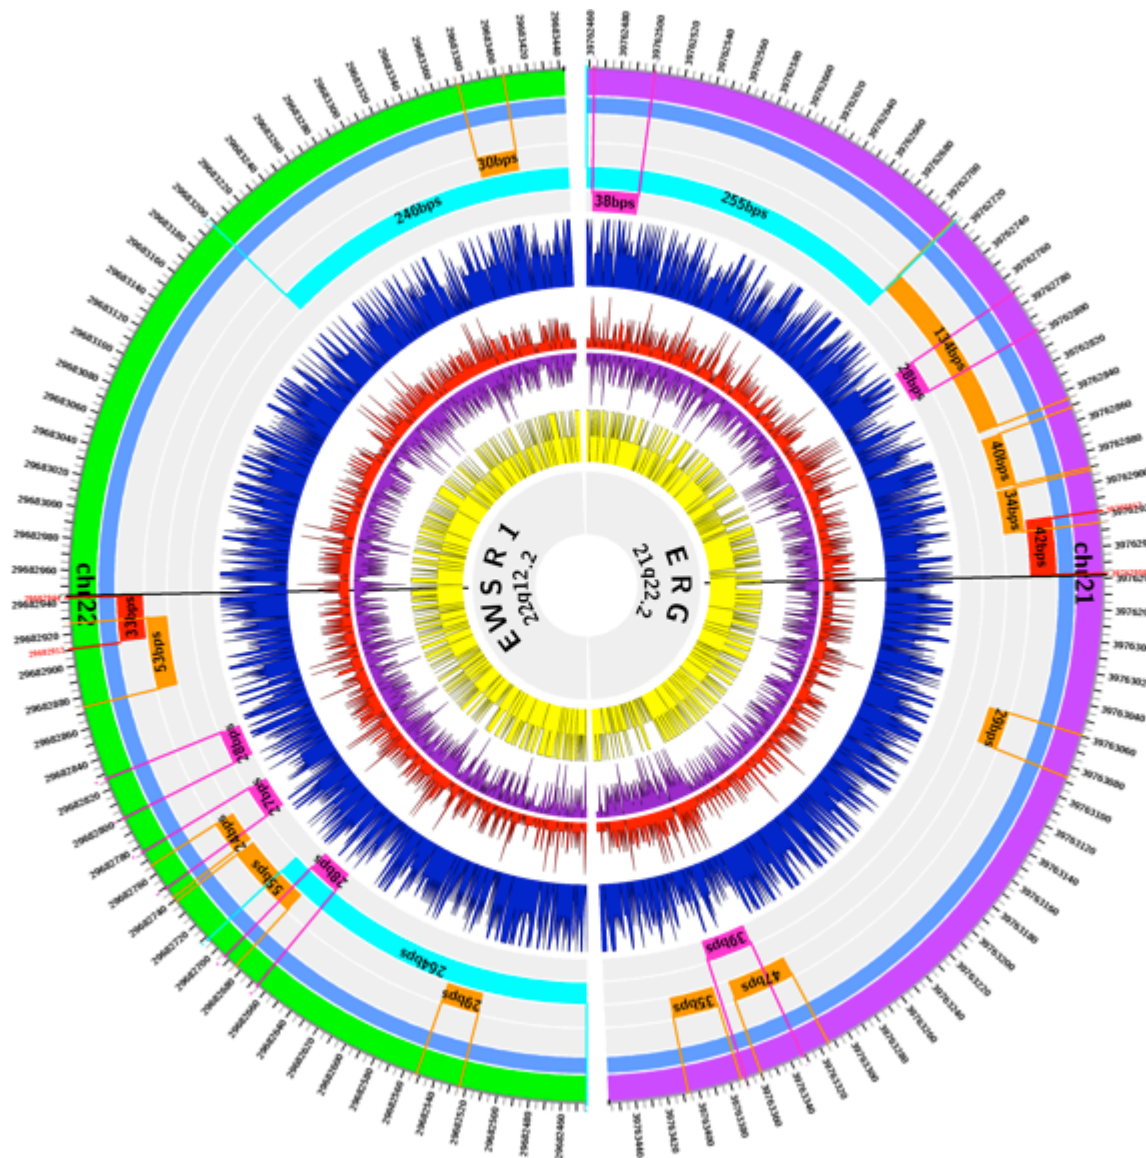

**Fig. (S2). Circos plot of various physico-chemical parameters at BpI for translocation t(21;22).** Sequential/ systematic depiction of all the parameters at or near the breakpoint region that are scrutinized in our study. The outermost trail demarcates the *BpI* sequence of 1000 bps of chr 21 (magenta) and 22 (fluorescent Green) in clockwise direction. While the inner trails demarcate various parameters as mentioned: Intronic region(blue); TICdb fusion sequence (red); SIDD regions(orange); Repeats (turquoise blue); Recombination signal sequence region (RSS-pink); graphical representation of Flexibility (dark blue); Stability(red); Stacking Energy (purple); Percentage of AT content(yellow); name of genes and their locations are mentioned in innermost circle. Horizontal black line indicates the exact breakpoint location and the respective features present at that particular point of break.
